## Prognostic value and prevalence of complete right bundle branch block in an elderly population: a community-based 10-year prospective study

Sherri Shih-Fan Yeh<sup>1</sup>, Ching-Yu Julius Chen<sup>2</sup>, I-Chien Wu<sup>3</sup>, Chih-Cheng Hsu<sup>3</sup>, Tzu-Yu Chen<sup>3</sup>, Wei-Ting Tseng<sup>3</sup>, Feng-Cheng Tang<sup>4</sup>, Chi-Chung Wang<sup>5</sup>, Chung-Chou Juan<sup>6</sup>, Hou-Chang Chiu<sup>7,8</sup>, Huey-Ming Lo<sup>9,10</sup>, Dun-Hui Yang<sup>11</sup>, Jyh-Ming Jimmy Juang<sup>2</sup>, Chao Agnes Hsiung<sup>3</sup>

<sup>1</sup>Department of Environmental and Occupational Medicine, National Taiwan University Hospital Hsin-Chu Branch, Hsin-Chu, Taiwan

<sup>2</sup>Cardiovascular Center and Division of Cardiology, Department of Internal Medicine, National Taiwan University Hospital and National Taiwan University College of Medicine, Taipei, Taiwan

<sup>3</sup>Institute of Population Health Sciences, National Health Research Institutes, Zhunan, Taiwan

<sup>4</sup>Department of Occupational Medicine, Changhua Christian Hospital, Changhua, Taiwan

<sup>5</sup>Department of Family Medicine, Mennonite Christian Hospital, Hualien, Taiwan

<sup>6</sup>Department of Surgery, Yuan's General Hospital, Kaohsiung, Taiwan

<sup>7</sup>Department of Neurology, Shin Kong Wu Ho Su Memorial Hospital, Taipei, Taiwan

<sup>8</sup>College of Medicine, Fu-Jen Catholic University, New Taipei, Taiwan

<sup>9</sup>Section of Cardiology, Department of Internal Medicine, Shin Kong Wu Ho-Su Memorial Hospital, Taipei, Taiwan

<sup>10</sup>School of Medicine, Fu-Jen Catholic University, New Taipei, Taiwan

<sup>11</sup>Department of Radiology, Tainan Municipal Hospital, Tainan, Taiwan

**Correspondence to:** Jyh-Ming Jimmy Juang; email: [jjmjuang@ntuh.gov.tw](mailto:jjmjuang@ntuh.gov.tw)

**Keywords:** right bundle branch block, electrocardiogram, elderly

**Received:** January 27, 2020

**Accepted:** July 6, 2020

**Published:** October 6, 2020

**Copyright:** © 2020 Yeh et al. This is an open access article distributed under the terms of the [Creative Commons Attribution License](https://creativecommons.org/licenses/by/3.0/) (CC BY 3.0), which permits unrestricted use, distribution, and reproduction in any medium, provided the original author and source are credited.

### ABSTRACT

Complete right bundle branch block (CRBBB) occurs in 0.2% to 1.3% of the general population, but its prognostic significance in the geriatric population is unknown. We prospectively investigated the prevalence and prognostic value of CRBBB in individuals aged  $\geq 65$  years in a community-based population in Taiwan. A total of 5,830 community-dwelling individuals were prospectively recruited from 7 regions across Taiwan starting in December 2008 through March 2013. Those aged  $\geq 65$  years were included in the analysis (N=3,383). All subjects underwent a home visit and standardized medical exams and were followed up annually until the end of April 2019; cause of death was documented by citizen death records. The mean age of the study cohort was  $73.5 \pm 5.9$  years (65-104), and 47.21% were men. Among these individuals, 171 (5.05%) had CRBBB; the prevalence was higher in men (7.08%) than in women (3.25%). Subjects with CRBBB were older than those without CRBBB ( $75.4 \pm 6.5$  vs.  $73.4 \pm 5.9$ ), and the frequency of CRBBB increased with age. Survival analysis revealed that all-cause mortality and cardiac mortality were similar in individuals with and without CRBBB during a mean follow-up of  $92.6 \pm 23.6$  months. CRBBB is not associated with increased risk of mortality in the geriatric population.

## INTRODUCTION

The world's population is aging: virtually every country in the world is experiencing growth in the number and proportion of older persons in its population. According to data from the United Nations' World Population Prospects, 1 in 11 people (9%) was over age 65 in 2019, and this proportion will increase to 1 in 6 people (15%) by 2050. It is therefore to be expected that the prevalence of diseases associated with old age, such as cardiovascular disease, will also rise.

The electrocardiogram (ECG) is a globally used, essential, inexpensive, and noninvasive technique to detect electric abnormalities of the heart. Disruption of normal electrical activity in the cardiac conduction system and delayed depolarization of the right ventricle consequently result in complete right bundle branch block (CRBBB). CRBBB is characterized by a QRS duration  $\geq 0.12$  seconds, a secondary R wave (R'), ST-segment depression and T-wave inversion in leads V1 or V2, and a wide slurred S wave in leads I, V5, and V6 of a 12-lead ECG. The prevalence and incidence of CRBBB is known to increase with age [1, 2]. CRBBB occurs in 0.3% to 1.6% of the general population; it can be an incidental finding on an ECG or a manifestation of underlying heart and pulmonary diseases [2–5].

The clinical significance of CRBBB in general populations has been extensively investigated. The age of enrolled individuals in previous studies ranged widely from 18 to 93 [6]. Although some previous studies included elderly individuals, the mean age of all previous study cohorts was 45–54 years old, which is below the typical cutoff for elderly populations (i.e., 65) [2, 6–13]. In addition, previous studies reported inconsistent results regarding the association between CRBBB and clinical outcomes such as all-cause mortality and cardiovascular mortality. For example, the Copenhagen City Heart Study enrolled individuals from the general population and reported that RBBB increased the risk of all-cause mortality and cardiac death in long-term follow-up [8]. However, the Swedish National registry data using hospital records showed that in men with RBBB, there was no increased risk of myocardial infarction (MI), heart failure, cardiac death or all-cause mortality [13]. Furthermore, the prognostic value of CRBBB was not specifically investigated in populations older than 65 years.

The Healthy Aging Longitudinal Study in Taiwan (HALST) is a prospective long-term community-based study of more than 5,800 adults that began in December 2008. It was designed to thoroughly examine the determinants of late-life health in an Asian population in Taiwan with long-term follow-up. The aim of the

present study was to investigate the prevalence of CRBBB in the general population  $\geq 65$  years of age (which we define here as “elderly”), and to establish the prognostic implications of incidentally found CRBBB.

## RESULTS

Among 5,830 healthy people enrolled in the HALST cohort, 3,745 were aged  $\geq 65$ ; of these, 362 were excluded due to left bundle branch block, old MI, lung diseases, and pacing rate, leaving 3,383 individuals for analysis (Figure 1). Twenty-two of these individuals (0.65%) dropped out or were lost to follow-up during the study period. The mean age of the study cohort was  $73.5 \pm 5.9$  years, and 1,597 (47.21%) were men. Of the 3,383 individuals, 171 (5.05%) had CRBBB (Figure 1). Subjects with CRBBB were significantly older than those without CRBBB ( $75.4 \pm 6.5$  vs.  $73.4 \pm 5.9$ ,  $P < 0.0001$ ; Table 1), and the prevalence of CRBBB was higher in men ( $n=113$ ; 7.08%) than in women ( $n=58$ ; 3.25%).

Figure 2A illustrates the age distribution among patients with and without CRBBB, showing that the group with CRBBB had a much higher percentage of people over 75. Figure 2B illustrates the prevalence of CRBBB in various age groups, showing that it significantly increased with age ( $P < 0.001$ ). On the other hand, the prevalence of CRBBB in elderly men was higher than that in elderly women regardless of age in this study (Figure 3). In additional subgroup analyses, we found that men older than 70 had significantly more CRBBB than women older than 70, whereas the difference was not significant below age 70 ( $P=0.0055$  in 70–74 group,  $P=0.0002$  in  $\geq 75$  group).

There were no significant differences in weight, body mass index, blood pressure, diabetes, dyslipidemia, previous events of stroke, atrial fibrillation, heart rate, and prognosis between those who had CRBBB and those who did not have CRBBB (Table 1). During an average follow-up of  $92.6 \pm 23.6$  months (7.7 years), neither all-cause mortality nor cardiovascular mortality were significantly different between the two groups (log-rank test,  $P=0.44$ , 0.52, respectively, Figure 4). After performing a Cox regression analysis controlling for potential confounders including stroke, hypertension, diabetes, dyslipidemia, and chronic kidney disease, CRBBB was still not significantly associated with all-cause mortality and cardiovascular mortality ( $P=0.48$  and 0.56, respectively).

We also summarized the prevalence of CRBBB in community-based studies worldwide in Table 2. Because our study cohort is all elderly individuals ( $\geq 65$  years), as expected, the average age of the individuals

(73.5±5.9) in our study was the highest. In addition, the total prevalence of CRBBB (5.05%) in our study was the highest compared to the prevalence of other previously published studies (0.28-2.10%) and the mean worldwide prevalence (1.14%, an average of the values in Table 2). Regarding the gender difference, the prevalence of CRBBB in both men and women in our study (7.08% and 3.25%, respectively) was also the highest among the published community-based studies (0.95-2.10% and 0.42-1.25%, respectively).

## DISCUSSION

The main findings of this study were as follows: 1) the prevalence of CRBBB was higher in men than in women and increased with age in both sexes; 2) the prevalence of CRBBB was much higher in this investigation compared with that in previous worldwide studies; 3) no significant association was shown between CRBBB and all-cause or cardiovascular mortality over an average 92.6±23.6 months of follow-up. To the best of our knowledge, this is the first study to examine the prevalence and prognosis of CRBBB in an elderly population with a mean age ≥65 years.

### Prevalence of CRBBB

Similar to previously published studies, our study showed that the prevalence of CRBBB was approximately twice to thrice as high in men compared

with women [2, 6, 8, 9] and it was associated with increasing age [2, 3, 6, 8]. Van der Ende et al. reported that the prevalence of RBBB was as low as 0.58% before age 65 and increased to 3.4% at age 65 and older in The Lifelines Cohort Study in the Netherlands [6]. The Copenhagen City Heart Study found that the prevalence of CRBBB ranged from less than 1% below age 30 to more than 14% above age 80 in men [8]. The age range of our study participants was between 65 and 104, with a mean age of 73.5±5.9 years, and was the oldest of any community-based study published to date. Since the prevalence of ECG abnormalities was shown to increase with age [8], the CRBBB prevalence increased from 3.63% at ages below 70 years to 6.87% at ages of 75 and older in our study. Our study cohort also exhibited the highest overall CRBBB prevalence among community-based studies, supporting the theory of degeneration of the conduction pathways caused by aging [2].

### Clinical implications

CRBBB is considered a manifestation of a gradually evolving generalized process involving not only bundle branches but also structural changes in working myocardium [14]. However, this evolving change did not translate into a more pronounced risk of mortality in geriatric populations. Our finding may help clinicians in their assessments of geriatric individuals with incidental CRBBB and decrease unnecessary anxiety. On the other

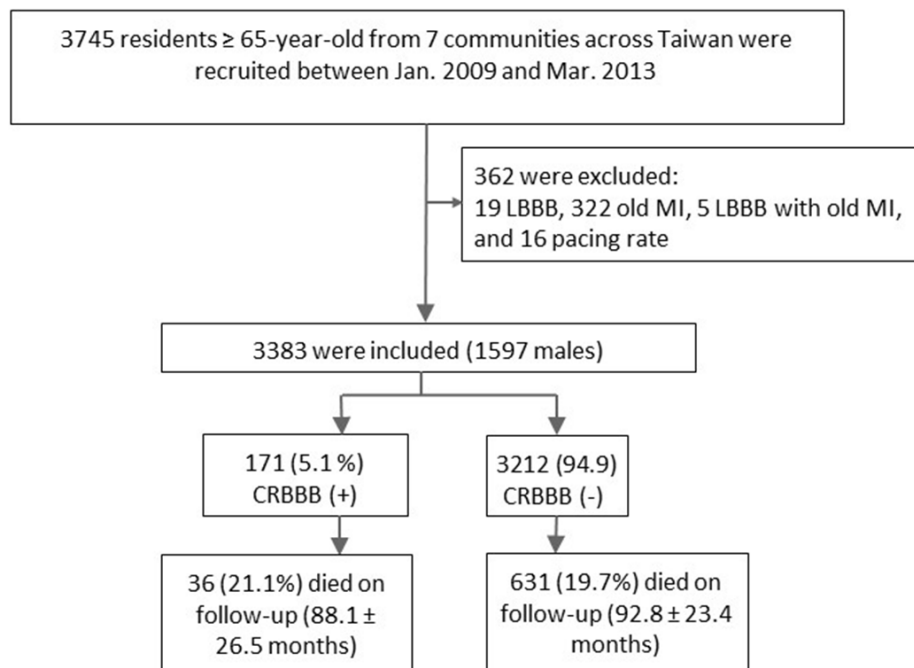

Figure 1. Flowchart of study subject selection.

**Table 1. General characteristics and prognosis of individuals with CRBBB and those without in the HALST cohort.**

|                          | CRBBB(-)<br>(n = 3212) | CRBBB(+)<br>(n = 171) | P-value |
|--------------------------|------------------------|-----------------------|---------|
| Men, n (%)               | 1484 (46.20)           | 113 (66.08)           | <0.0001 |
| Age, years               | 73.4±5.9               | 75.4±6.5              | <0.0001 |
| 65-70, n (%)             | 1090 (33.94)           | 41 (23.98)            | 0.0011  |
| 70-74, n (%)             | 1010 (31.44)           | 48 (28.07)            |         |
| ≥ 75, n (%)              | 1112 (34.62)           | 82 (47.95)            |         |
| Height, cm               | 157.8±8.4              | 160.4±8.7             | <0.0001 |
| Weight, kg               | 60.9±10.5              | 62.1±11.0             | 0.1447  |
| Hypertension, n (%)      | 1595 (49.66)           | 87 (50.88)            | 0.7599  |
| Diabetes mellitus, n (%) | 658 (20.49)            | 37 (21.64)            | 0.7164  |
| Dyslipidemia, n (%)      | 1014 (31.57)           | 51 (29.82)            | 0.6322  |
| Stroke, n (%)            | 200 (6.23)             | 6 (3.51)              | 0.1476  |
| ECG parameters           |                        |                       |         |
| Heart rate (beats/min)   | 67.5±10.3              | 67.0±10.8             | 0.5111  |
| QRS, ms                  | 91.8 (9.51)            | 143.1 (12.24)         | <0.0001 |
| QTc, ms                  | 436.9±22.3             | 456.1±24.9            | <0.0001 |
| QRS axis, degree         | 25.6±35.5              | 18.3±51.2             | 0.0112  |
| T axis, degree           | 40.9±31.8              | 21.6±31.0             | <0.0001 |

Abbreviations: HALST, Healthy Aging Longitudinal Study in Taiwan; ECG, electrocardiogram; CRBBB(+), Complete right bundle branch block positive; CRBBB(-), Complete right bundle branch block negative.

hand, CRBBB could mask the ECG phenotype of Brugada syndrome [15], which is a genetic disorder characterized by right bundle branch block and ST segment elevation in the precordial leads [16–20]. However, in elderly patients with CRBBB, the risk may be low even if the Brugada ECG is hidden by CRBBB [15].

### Long-term prognosis of elderly individuals with CRBBB

Previous community-based studies reported inconsistent results regarding the association between CRBBB and all-cause mortality and cardiovascular mortality. For example, Aro et al. evaluated the 12-lead ECGs of

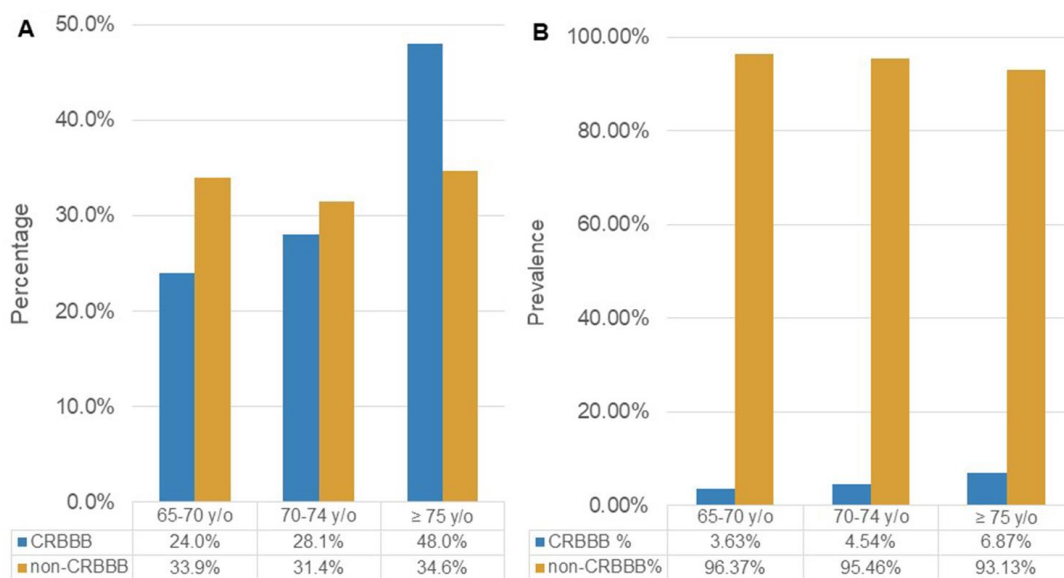

**Figure 2. (A)** The age distribution among patients with and without CRBBB. **(B)** Prevalence of CRBBB and non-CRBBB in each age group. (Abbreviation: CRBBB, complete right bundle branch block).

10,899 middle-aged Finnish subjects from the general population (52% male; mean age  $44 \pm 8.5$  years) and reported that prolonged QRS duration (intraventricular conduction delay) is strongly associated with an increased risk of arrhythmic-related mortality [12]. Bussink et al. reported that CRBBB was associated with increased cardiovascular risk and all-cause mortality in 18,441 asymptomatic Danish individuals, whereas incomplete RBBB was not [8]. However, Fleg et al. reported that, in 1,142 men constituting the population of the Baltimore Longitudinal Study on Aging with a follow-up period averaging 8.4 years, RBBB was a

manifestation of a primary abnormality of the cardiac conduction system but had no demonstrable adverse effect on long-term cardiac morbidity or mortality [21]. Eriksson et al. reported that in 7,392 men without a history of MI or stroke, there was no increased risk of cardiac or all-cause mortality in men with RBBB [13]. Some of these previous studies included only women or only men, and none of them were specific for individuals older than 65 years of age. To the best of our knowledge, ours is the first study to investigate an association between CRBBB and its prognostic value specifically for individuals older than 65 years of age on

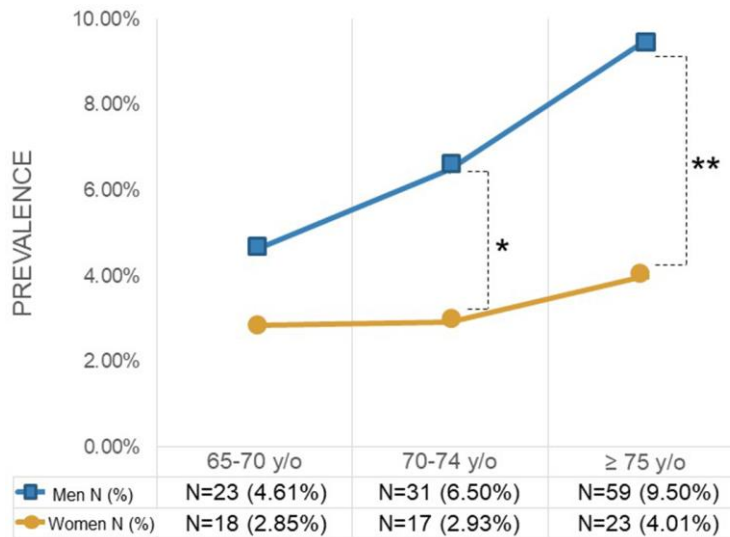

Figure 3. Prevalence of complete right bundle branch block by gender and age. \* $P < 0.05$ , \*\* $P < 0.005$ .

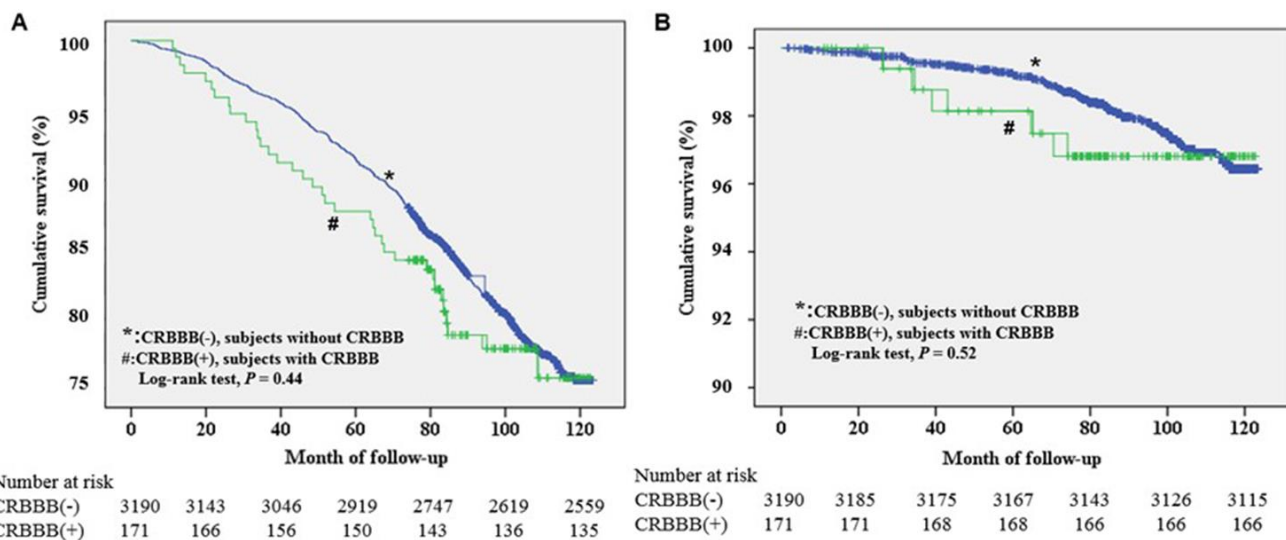

Figure 4. Kaplan-Meier survival analysis of all-cause mortality (A) and cardiovascular mortality (B) in elderly individuals with and without complete right bundle branch block.



**Table 2. Summary of prevalence of CRBBB, age distribution, association with clinical outcomes of the published community-based studies worldwide.**

| Study                           | Year | Country     | Screened population N | Gender     | Age (years)             | Subjects ≥ 65 years old | CRBBB (+)                                      |            |            | All-cause mortality | Cardiovascular mortality |
|---------------------------------|------|-------------|-----------------------|------------|-------------------------|-------------------------|------------------------------------------------|------------|------------|---------------------|--------------------------|
|                                 |      |             |                       |            |                         |                         | N (%)                                          | M (%)      | F (%)      |                     |                          |
| Van Der Ende et al.[6]          | 2017 | Netherlands | 149,803               | Both       | 18-93 (mean: 45±13)     | 10,777                  | <65 y: 825 (0.59)<br>≥65 y: 369 (3.42)         | 817 (1.29) | 377 (0.42) | NA                  | NA                       |
| Zhang et al.[7]                 | 2015 | USA         | 15,408                | Both       | 45-64 (mean: 54)        | 0                       | 228 (1.48)                                     | -          | -          | NA                  | NA                       |
| Nakamura et al.[9]              | 2013 | Japan       | 9,090                 | Both       | ≥30 (mean: 51)          | ?                       | 117 (1.29)<br>64.2±12.4 y                      | 76 (1.91)  | 41 (0.80)  | Not increased       | Not increased            |
| Bussink et al.[8]               | 2013 | Denmark     | 18,441                | Both       | ≥20 (mean: 50±13)       | 1,015                   | 166 (0.90)<br>M: 64.0±12.3 y<br>F: 61.6±10.2 y | 119 (1.40) | 47 (0.47)  | increased           | increased                |
| Zhang et al.[10]                | 2012 | USA         | 66,450                | Only women | Mean: 63                | ?                       | 832 (1.25)<br>65-67 y                          | -          | 832 (1.25) | Not increased       | Not increased            |
| Adesanya et al.[11]             | 2008 | USA         | 52,582                | Both       | ≥18                     | ?                       | 997 (1.90)<br>68.9±10 y                        | -          | -          | NA                  | NA                       |
| Aro et al.[12]                  | 2010 | Finland     | 10,899                | Both       | Mean: 44±9              | 0                       | 31 (0.28)                                      | -          | -          | Not increased       | Not increased            |
| Eriksson et al.[13]             | 2005 | Sweden      | 7,392                 | Only men   | Mean: 52±2              | 0                       | 70 (0.95)<br>52.4±2.3 y                        | 70 (0.95)  | -          | Not increased       | Not increased            |
| Taniguchi et al.[18]            | 2003 | Japan       | 2,722                 | Only men   | Mean: 43.2±1.2          | 0                       | 36 (1.32)<br>44.4±1.0 y                        | 36 (1.32)  | -          | Not increased       | Not increased            |
| Thrainsdottir et al.[2]         | 1993 | Iceland     | 18,762                | Both       | 33-79                   | 4677                    | 193 (1.03)                                     | 126 (1.38) | 67 (0.70)  | Not increased       | Not increased            |
| Fleg et al.[15]                 | 1983 | USA         | 1,142                 | Only men   | ?                       | ?                       | 24 (2.10)<br>75.4±6.5 y                        | 24 (2.10)  | -          | Not increased       | NA                       |
| Yeh et al. <i>present study</i> | 2020 | Taiwan      | 3,383                 | Both       | 65-104 (mean: 73.5±5.9) | 3,383                   | 171 (5.05)<br>75.4±6.5 y                       | 113 (7.08) | 58 (3.25)  | Not increased       | Not increased            |

Abbreviations: CRBBB, complete right bundle branch block; NA: not available, means no number was provided in the papers.

the basis of a 10-year follow-up study. In this study, we found that CRBBB was not associated with increased risk of all-cause mortality or cardiovascular mortality in asymptomatic individuals older than 65 years in the general population. Our findings provide an important reference for clinicians who are taking care of geriatric individuals.

### Limitations of the study

There are some limitations in this study. First, the population studied here was restricted to those with Han-Chinese ethnicity. It may not be applied to other ethnicities. Second, we do not have detailed clinical information such as echocardiographic assessment or coronary angiography or medications. For screening purposes, however, such information will rarely be available and thus the study mimics the setting in which screening would normally take place. Third, the HALST study is a well-designed cohort study with long term follow-up; all data used in the analysis including ECG data were carefully ascertained and read at central core labs by 2 independent cardiologists. However, as in other

observational studies, residual confounding remains a possibility despite adjusting for several potential confounders.

## CONCLUSIONS

The prevalence of CRBBB is higher in generally healthy individuals older than 65 years in the community compared to younger populations. However, CRBBB alone was not associated with an increased risk of all-cause or cardiovascular mortality in long-term follow-up.

## PATIENTS AND METHODS

### Recruitment process and study population

The HALST cohort has been described in our previous work [22]. In brief, the recruitment process was as follows: adults living in the townships located within 2 kilometers of the study hospital in 7 regions across Taiwan were stratified by age, gender, and education level, and respondents were selected from each stratum by the systematic random sampling method. These 7

locations (Figure 5) cover both urban and rural areas, as well as different ethnic groups speaking different dialects, reasonably representing diverse sociodemographic characteristics of the Taiwanese background population. The eligibility criterion was age 65 years or older, and exclusion criteria were a highly contagious infectious disease or severe illness including malignancy undergoing active treatment, inability to ambulate, and institutionalization or hospitalization. Subjects with severe hearing, speech, mental, or cognitive impairments were also excluded because of their inability to answer questions accurately.

All of the study participants underwent home-visit assessments that included interviewer-administered questionnaires as well as standardized clinical and laboratory examinations in a hospital. The demographic

variables explored include age, educational level, marital status, smoking status, alcohol intake, physical activity, and medications including antiarrhythmic drugs. Height, body weight, and blood pressure were recorded. Blood tests included lipid profile (total cholesterol, triglycerides, and HDL cholesterol), fasting glucose, and glycated hemoglobin (HbA1c). Hypertension was defined by self-report, the current use of anti-hypertensive medication, systolic blood pressure  $\geq 130$  mm Hg, or diastolic blood pressure  $\geq 85$  mm Hg at home. Dyslipidemia was defined by self-report, medication use, or high total cholesterol ( $\geq 240$  mg/dL) or triglycerides ( $\geq 150$  mg/dL) or reduced HDL cholesterol (men  $< 40$  mg/dL; women  $< 50$  mg/dL). Diabetes mellitus was defined by self-report, medication use, or high fasting plasma glucose ( $\geq 126$  mg/dL) or HbA1c ( $\geq 6.5\%$ ).

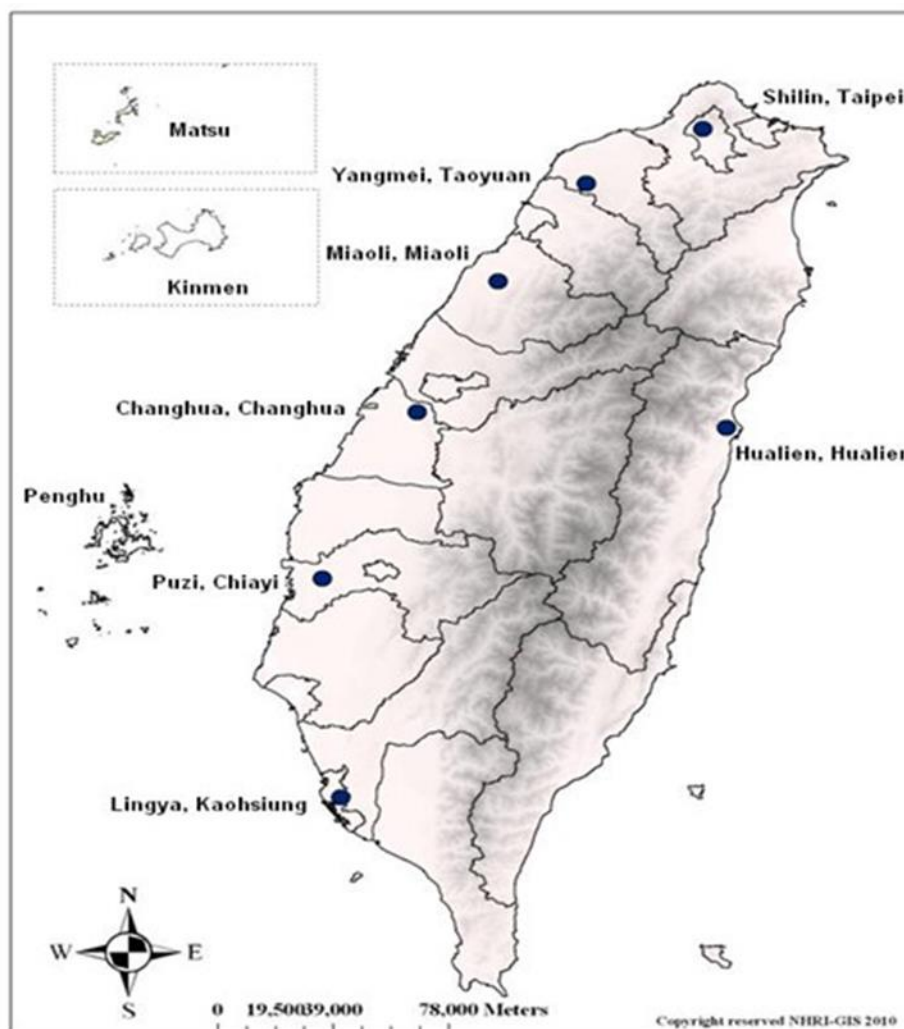

**Figure 5. Locations of the 7 participating sites across Taiwan in the HALST study.** Individuals were recruited from multiple regions across Taiwan, including 2 areas in the northern region, 2 in the central region, 2 in the southern region, and 1 in the eastern region. (Abbreviation: HALST, Healthy Aging Longitudinal Study in Taiwan).

This long-term prospective study was reviewed and approved by the Institutional Review Board of the National Health Research Institutes in Taiwan and their participating hospitals, and all participants provided written informed consent. Recruitment began in December 2008 and ended in March 2013. All enrollees were followed until death, and the cut-off for data collection in the current study was the end of April 2019. Among the 5,830 individuals enrolled in the HALST, we included 3,383 individuals  $\geq 65$  years of age who were free of documented heart disease at the time of enrollment (Figure 1). The participants with left bundle branch block, old MI, heart failure, severe valvular heart diseases, and arrhythmia were excluded from this study.

### ECG analysis and diagnostic criteria

All study subjects received 3 serial ECG examinations on the same day at enrollment. These 12-lead ECGs were recorded at 1-minute intervals using the standard settings of 10 mm/mV and 25 mm/s; PR, QRS, and corrected QT interval were automatically computed by Bazett's formula. CRBBB was classified according to the Minnesota Code criteria (7-2-1) by a QRS duration  $\geq 120$  ms in a majority of beats in any of leads I, II, III, aVL, or aVF, plus  $R' > R$  in lead V1 or V2; or QRS mainly upright, with an R-peak duration  $\geq 60$  ms in V1 or V2; or S duration  $> R$  duration in all beats in lead I or II, as in previous studies [9, 10, 23]. All ECGs were analyzed and interpreted by two independent cardiologists who were blinded to the participants' clinical data. Those with left bundle branch block, old MI, pacing rhythm, lung diseases, or poor image quality on ECG were excluded from this study (Figure 1).

### Follow-up and outcomes

An annual follow-up telephone interview was carried out for all study participants. Information on the cause of death, if applicable, was determined by linking the database of death records from the Taiwan Ministry of Health and Welfare. We used International Classification of Diseases version 10 (ICD-10) codes to identify the cause of death and defined cardiovascular death by the ICD codes I01-I02.0, I05-I09, I20-I25, I27, and I30-I52. Survival curves were plotted by the Kaplan–Meier method, and the log-rank test was used for the comparison of the difference in mortality between patients with and without CRBBB.

### Statistical and survival analysis

We used either Chi-square or Fisher's exact tests to compare categorical variables and one-way ANOVA for continuous variables. Inter-observer agreement was

determined by the overall proportion of agreement across all ECGs using the Kappa statistic. The log-rank test and a Cox regression model were used for the comparison of the difference in mortality between participants with and without CRBBB. A two-tailed *P* value  $< 0.05$  was considered significant.

### AUTHOR CONTRIBUTIONS

Conceptualization, I.-C. W., C.-C. H., T.-Y. C., W.-T. T., C. A. H., and J.-M. J. J.; Formal Analysis, S. S.-F. Y. and C.-Y. J. C., D.-H. Y., and J.-M. J. J.; Investigation, I.-C. W., C.-C. H., T.-Y. C., W.-T. T., F.-C. T., C.-C. W., C.-C. J., H.-C. C., and H.-M. L.; Data Curation, I.-C. W., C.-C. H., T.-Y. C. W.-T. T., F.-C. T., C.-C. W., C.-C. J., H.-C. C., and H.-M. L.; Writing – Original Draft Preparation, S. S.-F. Y., C.-Y. J. C. and D.-H. Y.; Writing – Review & Editing, S. S.-F. Y., C.-Y. J. C., I.-C. W., C.-C. H., T.-Y. C., W.-T. T., F.-C. T., C.-C. W., C.-C. J., H.-C. C., H.-M. L., D.-H. Y., J.-M. J. J., and C. A. H.; Supervision, C. A. H., and J.-M. J. J.; Funding Acquisition, C. A. H. and J.-M. J. J.

### ACKNOWLEDGMENTS

The authors thank Melissa Stauffer of Scientific Editing Solutions for editing the manuscript. We are grateful to the HALST study's advisory committee (Drs. Luigi Ferrucci, Jack M. Guralnik, Dilip V. Jeste, and Kung-Yee Liang) for the valuable suggestions. We wish to thank the men and women who participated in the study, and all the members of the HALST study group. The members of the HALST study group are as follows: Drs. Chao-Agnes Hsiung, Chih-Cheng Hsu, I-Chien Wu, Hsing-Yi Chang, Chu-Chih Chen, Yen-Feng Chiu, Hui-Ju Tsai, and Ken N. Kuo, of National Health Research Institutes; Dr. Ching-Yu Chen of National Taiwan University; Dr. Kiang Liu of Northwestern University Medical School; Dr. Marion Lee of University of California at San Francisco; Dr. Ida Chen of Cedars-Sinai Medical Center; Dr. Shu-Han Yu of Chung Shan Medical University; Dr. Kai-Ting Ko of Mackay Memorial Hospital; Dr. Tzuo-Yun Lan of National Yang-Ming University; Dr. Hou-Chang Chiu of Shin Kong Wu Ho-Su Memorial Hospital; Dr. Wen-Jin Liaw of Yee Zen General Hospital; Dr. Yo-Hann Liu of Hope Doctors Hospital; Dr. I-Ching Lin of Changhua Christian Hospital; Dr. Ping-An Wu of Potz General Hospital; Dr. Chon-Chou Juan of Yuan's General Hospital; and Dr. Shi-Chen Shen of Mennonite Christian Hospital. We are also grateful to the staff of the Sixth Core Lab, Department of Medical Research, National Taiwan University Hospital, and the Taiwan Health Foundation for technical support.



## CONFLICTS OF INTEREST

The authors have no conflicts of interest to declare.

## FUNDING

This work was supported by the National Health Research Institutes of Taiwan under Grants PH-101-SP-01, PH-102-SP-01, and PH-103-SP-01; the Ministry of Science and Technology of Taiwan (grant numbers: MOST-104-2314-B-002-193-MY3, MOST 106-2314-B-002-047-MY3, MOST 106-2314-B-002 -134 -MY2, MOST 106-2314-B-002-206, MOST 107-2314-B-002-009, MOST 107-2314-B-002-261-MY3, and MOST 108-2635-B-002-002); and the Taiwan Health Foundation, National Taiwan University Hospital (grant numbers: NTUH 105-S3077, NTUH-105-S2995, NTUH-UN105-012, NTUH 106-S3469, NTUH106-S3458, and NTUH 106-018).

## REFERENCES

1. Eriksson P, Hansson PO, Eriksson H, Dellborg M. Bundle-branch block in a general male population: the study of men born 1913. *Circulation*. 1998; 98:2494–500.  
<https://doi.org/10.1161/01.cir.98.22.2494>  
PMID:9832497
2. Thrainsdottir IS, Hardarson T, Thorgeirsson G, Sigvaldason H, Sigfusson N. The epidemiology of right bundle branch block and its association with cardiovascular morbidity—the reykjavik study. *Eur Heart J*. 1993; 14:1590–96.  
<https://doi.org/10.1093/eurheartj/14.12.1590>  
PMID:8131755
3. Fahy GJ, Pinski SL, Miller DP, McCabe N, Pye C, Walsh MJ, Robinson K. Natural history of isolated bundle branch block. *Am J Cardiol*. 1996; 77:1185–90.  
[https://doi.org/10.1016/s0002-9149\(96\)00160-9](https://doi.org/10.1016/s0002-9149(96)00160-9)  
PMID:8651093
4. Juang JJ, Horie M. Genetics of brugada syndrome. *J Arrhythm*. 2016; 32:418–25.  
<https://doi.org/10.1016/j.joa.2016.07.012>  
PMID:27761167
5. Juang JM, Lu TP, Lai LC, Ho CC, Liu YB, Tsai CT, Lin LY, Yu CC, Chen WJ, Chiang FT, Yeh SF, Lai LP, Chuang EY, Lin JL. Disease-targeted sequencing of ion channel genes identifies de novo mutations in patients with non-familial brugada syndrome. *Sci Rep*. 2014; 4:6733.  
<https://doi.org/10.1038/srep06733> PMID:25339316
6. van der Ende MY, Siland JE, Snieder H, van der Harst P, Rienstra M. Population-based values and abnormalities of the electrocardiogram in the general dutch population: the LifeLines cohort study. *Clin Cardiol*. 2017; 40:865–72.  
<https://doi.org/10.1002/clc.22737> PMID:28605034
7. Zhang ZM, Rautaharju PM, Prineas RJ, Whitsel EA, Tereshchenko L, Soliman EZ. A wide QRS/T angle in bundle branch blocks is associated with increased risk for coronary heart disease and all-cause mortality in the Atherosclerosis Risk In Communities (ARIC) study. *J Electrocardiol*. 2015; 48:672–77.  
<https://doi.org/10.1016/j.jelectrocard.2015.04.014>  
PMID:25959262
8. Bussink BE, Holst AG, Jespersen L, Deckers JW, Jensen GB, Prescott E. Right bundle branch block: prevalence, risk factors, and outcome in the general population: results from the copenhagen city heart study. *Eur Heart J*. 2013; 34:138–46.  
<https://doi.org/10.1093/eurheartj/ehs291>  
PMID:22947613
9. Nakamura Y, Okamura T, Inohara T, Kohsaka S, Watanabe M, Higashiyama A, Kadota A, Okuda N, Ohkubo T, Nagasawa SY, Miura K, Okayama A, Ueshima H, and NIPPON DATA 80 Research Group. Prognostic values of bundle branch blocks for cardiovascular mortality in Japanese (24year follow-up of NIPPON DATA80). *J Electrocardiol*. 2013; 46:360–65.  
<https://doi.org/10.1016/j.jelectrocard.2013.03.009>  
PMID:23597404
10. Zhang ZM, Rautaharju PM, Soliman EZ, Manson JE, Cain ME, Martin LW, Bavry AA, Mehta L, Vitolins M, Prineas RJ. Mortality risk associated with bundle branch blocks and related repolarization abnormalities (from the Women’s Health Initiative [WHI]). *Am J Cardiol*. 2012; 110:1489–95.  
<https://doi.org/10.1016/j.amjcard.2012.06.060>  
PMID:22858187
11. Adesanya CO, Yousuf KA, Co C, Gaur S, Ahmed S, Pothoulakis A, Suryaprasad A, Gupta S. Is wider worse? QRS duration predicts cardiac mortality in patients with right bundle branch block. *Ann Noninvasive Electrocardiol*. 2008; 13:165–70.  
<https://doi.org/10.1111/j.1542-474X.2008.00216.x>  
PMID:18426442
12. Aro AL, Anttonen O, Tikkanen JT, Junttila MJ, Kerola T, Rissanen HA, Reunanen A, Huikuri HV. Intraventricular conduction delay in a standard 12-lead electrocardiogram as a predictor of mortality in the general population. *Circ Arrhythm Electrophysiol*. 2011; 4:704–10.  
<https://doi.org/10.1161/CIRCEP.111.963561>  
PMID:21841194
13. Eriksson P, Wilhelmsen L, Rosengren A. Bundle-branch block in middle-aged men: risk of complications and

- death over 28 years. The primary prevention study in göteborg, Sweden. *Eur Heart J*. 2005; 26:2300–06.  
<https://doi.org/10.1093/eurheartj/ehi580>  
PMID:16214833
14. Bacharova L, Szathmary V, Mateasik A. Electrocardiographic patterns of left bundle-branch block caused by intraventricular conduction impairment in working myocardium: a model study. *J Electrocardiol*. 2011; 44:768–78.  
<https://doi.org/10.1016/j.jelectrocard.2011.03.007>  
PMID:21658710
15. Aizawa Y, Takatsuki S, Sano M, Kimura T, Nishiyama N, Fukumoto K, Tanimoto Y, Tanimoto K, Murata M, Komatsu T, Mitamura H, Ogawa S, Funazaki T, et al. Brugada syndrome behind complete right bundle-branch block. *Circulation*. 2013; 128:1048–54.  
<https://doi.org/10.1161/CIRCULATIONAHA.113.003472>  
PMID:23902757
16. Brugada P, Brugada J. Right bundle branch block, persistent ST segment elevation and sudden cardiac death: a distinct clinical and electrocardiographic syndrome. A multicenter report. *J Am Coll Cardiol*. 1992; 20:1391–96.  
[https://doi.org/10.1016/0735-1097\(92\)90253-j](https://doi.org/10.1016/0735-1097(92)90253-j)  
PMID:1309182
17. Antzelevitch C, Brugada P, Borggrefe M, Brugada J, Brugada R, Corrado D, Gussak I, LeMarec H, Nademanee K, Perez Riera AR, Shimizu W, Schulze-Bahr E, Tan H, Wilde A. Brugada syndrome: report of the second consensus conference: endorsed by the heart rhythm society and the european heart rhythm association. *Circulation*. 2005; 111:659–70.  
<https://doi.org/10.1161/01.CIR.0000152479.54298.51>  
PMID:15655131
18. Priori SG, Wilde AA, Horie M, Cho Y, Behr ER, Berul C, Blom N, Brugada J, Chiang CE, Huikuri H, Kannankeril P, Krahn A, Leenhardt A, et al, and Document Reviewers, and Heart Rhythm Society, and European Heart Rhythm Association, and Asia Pacific Heart Rhythm Society. Executive summary: HRS/EHRA/APHR expert consensus statement on the diagnosis and management of patients with inherited primary arrhythmia syndromes. *Europace*. 2013; 15:1389–406.  
<https://doi.org/10.1093/europace/eut272>  
PMID:23994779
19. Antzelevitch C, Yan GX, Ackerman MJ, Borggrefe M, Corrado D, Guo J, Gussak I, Hasdemir C, Horie M, Huikuri H, Ma C, Morita H, Nam GB, et al. J-wave syndromes expert consensus conference report: emerging concepts and gaps in knowledge. *J Arrhythm*. 2016; 32:315–39.  
<https://doi.org/10.1016/j.joa.2016.07.002>  
PMID:27761155
20. Juang JM, Lu TP, Lai LC, Hsueh CH, Liu YB, Tsai CT, Lin LY, Yu CC, Hwang JJ, Chiang FT, Yeh SS, Chen WP, Chuang EY, et al. Utilizing multiple in silico analyses to identify putative causal SCN5A variants in brugada syndrome. *Sci Rep*. 2014; 4:3850.  
<https://doi.org/10.1038/srep03850> PMID:24463578
21. Fleg JL, Das DN, Lakatta EG. Right bundle branch block: long-term prognosis in apparently healthy men. *J Am Coll Cardiol*. 1983; 1:887–92.  
[https://doi.org/10.1016/s0735-1097\(83\)80204-6](https://doi.org/10.1016/s0735-1097(83)80204-6)  
PMID:6826977
22. Juang JM, Chen CY, Chen YH, Wu IC, Hsu CC, Chen LN, Tang FC, Wang CC, Juan CC, Chiu HC, Lo HM, Chang IS, Hwang JJ, et al. Prevalence and prognosis of brugada electrocardiogram patterns in an elderly han Chinese population: a nation-wide community-based study (HALST cohort). *Europace*. 2015 (Suppl 2); 17:ii54–62.  
<https://doi.org/10.1093/europace/euv141>  
PMID:26842116
23. Antzelevitch C, Brugada P, Borggrefe M, Brugada J, Brugada R, Corrado D, Gussak I, LeMarec H, Nademanee K, Perez Riera AR, Shimizu W, Schulze-Bahr E, Tan H, Wilde A. Brugada syndrome: report of the second consensus conference. *Heart Rhythm*. 2005; 2:429–40.  
<https://doi.org/10.1016/j.hrthm.2005.01.005>  
PMID:15898165
